# Supplementary material for: Optimization of ultrasonic-assisted extraction of total flavonoids from Oxalis corniculata by a hybrid response surface methodology-artificial neural network-genetic algorithm (RSM-ANN-GA) approach, coupled with an assessment of antioxidant activities
Source: Royal Society of Chemistry journal article supplement (doi:10.1039/d4ra05077k), 2024-01-01
Supplement: d4ra05077k1.pdf [file d4ra05077k1.pdf]

## Supplementary data

### Optimization of Ultrasonic-Assisted Extraction of Total Flavonoids from *Oxalis corniculata* by a Hybrid Response Surface Methodology-Artificial Neural Network-Genetic Algorithm (RSM-ANN-GA) Approach, Coupled with an Assessment of Antioxidant Activities

Tab. S1 Factors and levels in Box–Behnken design

| Level | Factor                         |                             |                            |                           |
|-------|--------------------------------|-----------------------------|----------------------------|---------------------------|
|       | ethanol concentration( $X_1$ ) | liquid-solid ratio( $X_2$ ) | ultrasonic power ( $X_3$ ) | ultrasonic time ( $X_4$ ) |
| 1     | 70%                            | 45mL/g                      | 400w                       | 70min                     |
| 0     | 60%                            | 40 mL/g                     | 350w                       | 60min                     |
| -1    | 50%                            | 35 mL/g                     | 300w                       | 50min                     |

Tab. S2 Box-Behnken design with RSM and ANN results

| Std | $X_1$ | $X_2$ | $X_3$ | $X_4$ | Experiment   | TFO yield (mg/g) |               |
|-----|-------|-------|-------|-------|--------------|------------------|---------------|
|     |       |       |       |       |              | RSM Predicted    | ANN Predicted |
| 1   | 70    | 40    | 400   | 60    | 10.11 ± 0.06 | 10.31            | 10.10         |
| 2   | 50    | 40    | 350   | 70    | 9.94 ± 0.05  | 9.87             | 10.06         |
| 3   | 60    | 40    | 350   | 60    | 13.21 ± 0.13 | 13.41            | 13.42         |
| 4   | 60    | 45    | 300   | 60    | 10.12 ± 0.08 | 10.27            | 10.34         |
| 5   | 50    | 40    | 400   | 60    | 9.31 ± 0.06  | 9.20             | 9.22          |
| 6   | 60    | 40    | 350   | 60    | 13.45 ± 0.12 | 13.41            | 13.42         |
| 7   | 50    | 40    | 350   | 50    | 9.31 ± 0.06  | 9.57             | 9.20          |
| 8   | 60    | 40    | 350   | 60    | 13.18 ± 0.18 | 13.41            | 13.42         |
| 9   | 70    | 45    | 350   | 60    | 11.34 ± 0.07 | 11.48            | 11.34         |
| 10  | 60    | 35    | 350   | 50    | 9.73 ± 0.05  | 9.80             | 9.67          |
| 11  | 60    | 40    | 400   | 50    | 10.32 ± 0.07 | 10.53            | 10.28         |
| 12  | 60    | 40    | 350   | 60    | 13.45 ± 0.11 | 13.41            | 13.42         |
| 13  | 60    | 40    | 300   | 70    | 10.40 ± 0.06 | 10.15            | 10.40         |
| 14  | 60    | 40    | 350   | 60    | 13.77 ± 0.16 | 13.41            | 13.62         |
| 15  | 60    | 45    | 350   | 50    | 12.10 ± 0.11 | 11.86            | 12.07         |
| 16  | 60    | 40    | 300   | 50    | 10.54 ± 0.05 | 10.29            | 10.50         |
| 17  | 60    | 40    | 400   | 70    | 10.06 ± 0.06 | 10.28            | 10.02         |
| 18  | 50    | 45    | 350   | 60    | 9.60 ± 0.05  | 9.74             | 9.62          |
| 19  | 50    | 35    | 350   | 60    | 9.31 ± 0.06  | 9.13             | 9.30          |

|    |    |    |     |    |                  |       |       |
|----|----|----|-----|----|------------------|-------|-------|
| 20 | 60 | 35 | 400 | 60 | $9.67 \pm 0.07$  | 9.40  | 9.52  |
| 21 | 70 | 35 | 350 | 60 | $10.16 \pm 0.05$ | 9.99  | 10.16 |
| 22 | 60 | 35 | 350 | 70 | $10.22 \pm 0.08$ | 10.62 | 10.13 |
| 23 | 70 | 40 | 300 | 60 | $10.06 \pm 0.05$ | 10.32 | 10.05 |
| 24 | 60 | 45 | 400 | 60 | $11.10 \pm 0.06$ | 10.83 | 10.71 |
| 25 | 70 | 40 | 350 | 50 | $11.42 \pm 0.10$ | 11.37 | 11.41 |
| 26 | 70 | 40 | 350 | 70 | $11.07 \pm 0.07$ | 10.69 | 11.07 |
| 27 | 50 | 40 | 300 | 60 | $8.87 \pm 0.05$  | 8.82  | 8.87  |
| 28 | 60 | 45 | 350 | 70 | $10.58 \pm 0.08$ | 10.66 | 10.54 |
| 29 | 60 | 35 | 300 | 60 | $9.45 \pm 0.06$  | 9.60  | 9.47  |

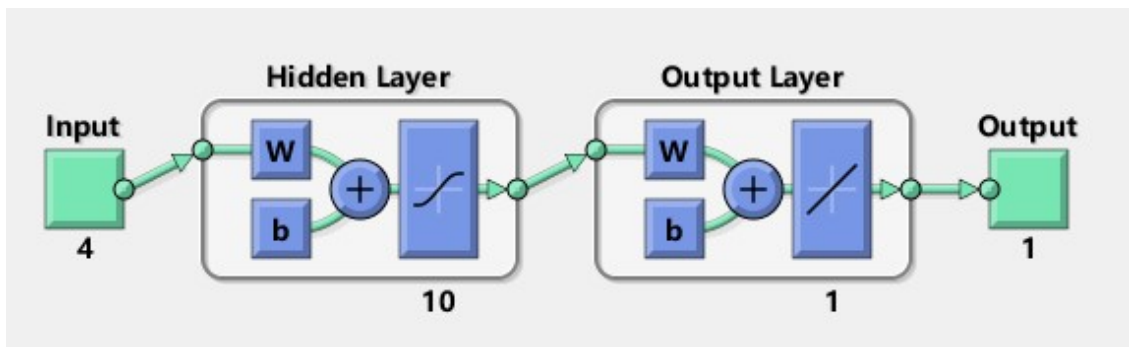

Fig. S1 The artificial neural network architecture topology

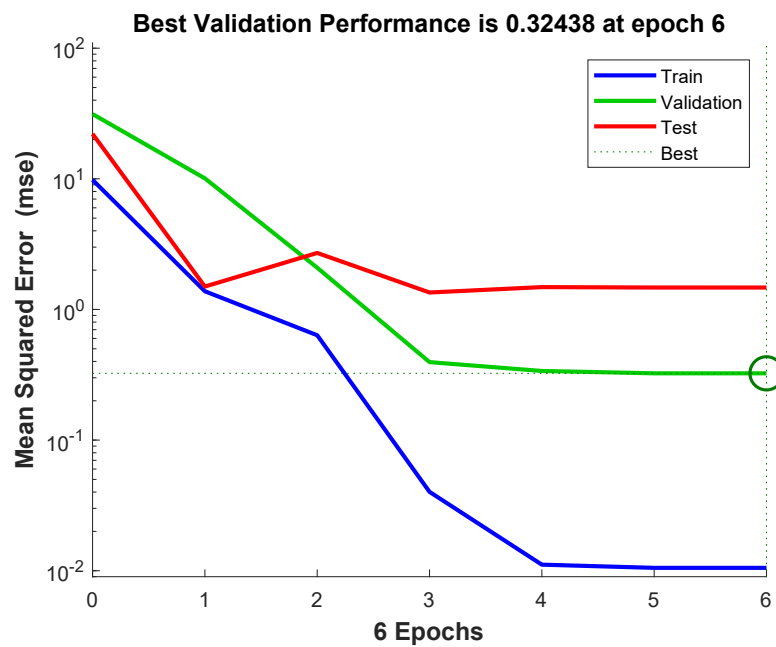

Fig. S2 BP-ANN training performance of TFO
